# Supplementary material for: Medical Record Review to Differentiate between Idiopathic Parkinson’s Disease and Parkinsonism: A Danish Record Linkage Study with 10 Years of Follow-Up
Source: Hindawi journal article supplement (doi:10.1155/2015/781479), 2015-01-01

**Supplementary Table 1. Diagnostic value of clinical features in iPD cases and non-iPD cases based on symptoms and medications (ever/never listed in medical records)**

| Criteria                                                    | IPD (N=2,068) |      | Non-IPD (n=378) |      | $\chi^2$ P-value <sup>a</sup> | Sensitivity | Specificity | Positive predictive value | Negative predictive value |
|-------------------------------------------------------------|---------------|------|-----------------|------|-------------------------------|-------------|-------------|---------------------------|---------------------------|
|                                                             | N             | %    | N               | %    |                               |             |             |                           |                           |
| <b>Symptoms</b>                                             |               |      |                 |      |                               |             |             |                           |                           |
| Tremor                                                      | 1750          | 84.6 | 241             | 63.8 | <0.0001                       | 0.85        | 0.36        | 0.88                      | 0.30                      |
| Rigidity                                                    | 1977          | 95.6 | 282             | 74.6 | <0.0001                       | 0.96        | 0.25        | 0.88                      | 0.51                      |
| Bradykinesia                                                | 1932          | 93.4 | 259             | 68.5 | <0.0001                       | 0.93        | 0.31        | 0.88                      | 0.47                      |
| Postural instability                                        | 674           | 32.6 | 166             | 43.9 | <0.0001                       | 0.33        | 0.56        | 0.80                      | 0.13                      |
| Freezing phenomena                                          | 127           | 6.1  | 25              | 6.6  | 0.7264                        | 0.06        | 0.93        | 0.84                      | 0.15                      |
| Falls                                                       | 55            | 2.7  | 75              | 19.8 | <0.0001                       | 0.03        | 0.80        | 0.42                      | 0.13                      |
| Hallucinations unrelated to medication                      | 12            | 0.6  | 34              | 9.0  | <0.0001                       | 0.01        | 0.91        | 0.26                      | 0.14                      |
| Severe autonomic dysfunction                                | 159           | 7.7  | 83              | 22.0 | <0.0001                       | 0.08        | 0.78        | 0.66                      | 0.13                      |
| Dementia                                                    | 223           | 10.8 | 100             | 26.5 | <0.0001                       | 0.11        | 0.74        | 0.69                      | 0.13                      |
| First PD medication used                                    | 2052          | 99.2 | 300             | 79.4 | <0.0001                       | 0.99        | 0.21        | 0.87                      | 0.83                      |
| <b>Medication use</b>                                       |               |      |                 |      |                               |             |             |                           |                           |
| Levodopa                                                    | 1806          | 87.3 | 290             | 76.7 | <0.0001                       | 0.87        | 0.23        | 0.86                      | 0.25                      |
| Agonist ergolin                                             | 752           | 36.4 | 56              | 14.8 | <0.0001                       | 0.36        | 0.85        | 0.93                      | 0.20                      |
| Agonist non ergolin                                         | 1551          | 75.0 | 120             | 31.7 | <0.0001                       | 0.75        | 0.68        | 0.93                      | 0.33                      |
| Amantadin                                                   | 249           | 12.0 | 47              | 12.4 | 0.8293                        | 0.12        | 0.88        | 0.84                      | 0.15                      |
| COMT inhibitor                                              | 1096          | 53.0 | 91              | 24.1 | <0.0001                       | 0.53        | 0.76        | 0.92                      | 0.23                      |
| MAO-B                                                       | 1053          | 50.9 | 79              | 20.9 | <0.0001                       | 0.51        | 0.79        | 0.93                      | 0.23                      |
| <b>Multiple criteria</b>                                    |               |      |                 |      |                               |             |             |                           |                           |
| Conventional criteria (at least 2 of T, R, B <sup>b</sup> ) | 2011          | 97.2 | 279             | 73.8 | <0.0001                       | 0.97        | 0.26        | 0.88                      | 0.63                      |
| All 3 cardinal features (T, R, B)                           | 1592          | 77.0 | 171             | 45.2 | <0.0001                       | 0.77        | 0.55        | 0.90                      | 0.30                      |
| Asymmetrical onset and atypical features <sup>c</sup>       | 1898          | 91.8 | 321             | 84.9 | <0.0001                       | 0.92        | 0.15        | 0.86                      | 0.25                      |

<sup>a</sup>  $\chi^2$  test comparing the proportion of cases with iPD having the clinical features.

<sup>b</sup> T=Tremor; R=Rigidity; B= Bradykinesia.

<sup>c</sup> Atypical features included dementia, early falls, severe symptomatic dysautonomia, fast time to progression, sudden symptoms, hallucination unrelated to medications, freezing phenomena, Babinski's sign and supranuclear gaze palsy.

**Supplementary Table 2. Medical treatment registered in charts at any time**

| Diagnosis                | Total | Levodopa |       | Agonist ergolin |      | Agonist non ergolin |      | COMT inhibitor |      | MAO-B |      |
|--------------------------|-------|----------|-------|-----------------|------|---------------------|------|----------------|------|-------|------|
|                          |       | N        | %     | N               | %    | N                   | %    | N              | %    | N     | %    |
| IPD                      | 2068  | 1806     | 87.3  | 752             | 36.4 | 1551                | 75.0 | 1096           | 53.0 | 1053  | 50.9 |
| IPD-interviewed          | 1813  | 1560     | 86.0  | 624             | 34.4 | 1391                | 76.7 | 932            | 51.4 | 918   | 50.6 |
| LBD                      | 53    | 50       | 94.3  | 2               | 3.8  | 24                  | 45.3 | 15             | 28.3 | 13    | 24.5 |
| MSA                      | 44    | 44       | 100.0 | 14              | 31.8 | 31                  | 70.5 | 23             | 52.3 | 22    | 50.0 |
| PSP + CBD                | 21    | 21       | 100.0 | 5               | 23.8 | 6                   | 28.6 | 6              | 28.6 | 3     | 14.3 |
| Sec + other Parkinsonism | 125   | 112      | 89.6  | 25              | 20.0 | 45                  | 36.0 | 40             | 32.0 | 29    | 23.2 |
| Essential tremor         | 35    | 20       | 57.1  | 7               | 20.0 | 5                   | 14.3 | 2              | 5.7  | 5     | 14.3 |

Supplementary Figure 1. ROC curves for diagnosing IPD based on symptoms and PD medications (listed in medical records within 1 year after diagnosis)

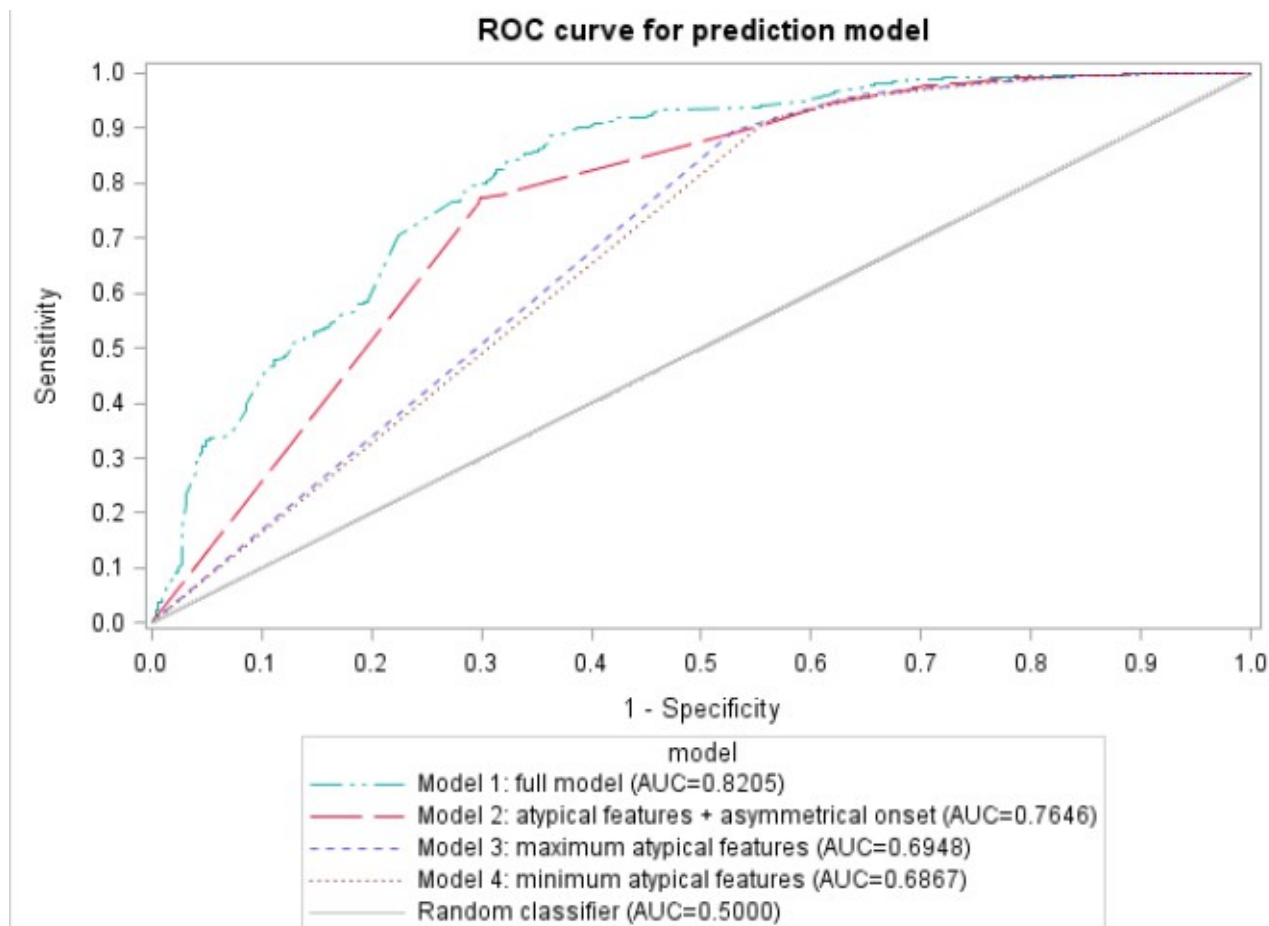

Supplement: f1 [file 781479.f1.pdf]
